# Supplementary material for: The Underrepresentation of Females in Studies Assessing the Impact of High-Dose Exercise on Cardiovascular Outcomes: a Scoping Review
Source: PubMed Central journal article supplement (PMC8085142; doi:10.1186/s40798-021-00320-y), 2021-04-29
Supplement: 40798_2021_320_MOESM1_ESM.pdf [file 40798_2021_320_MOESM1_ESM.pdf]

## Supplementary Documents

### Supplement 1 – PICO framework

|                                                                                                          |                                                                                                                                                                           |
|----------------------------------------------------------------------------------------------------------|---------------------------------------------------------------------------------------------------------------------------------------------------------------------------|
| <b>Participants:</b><br>All humans<br>Children<br>Adults<br>Males<br>Females<br>Athletes<br>Non-athletes | <b>Intervention:</b><br>High dose/high intensity/high levels/ intensive/above recommended<br>Dose response?<br>Physical activity/exercise/training/                       |
| <b>Comparison:</b><br>NA                                                                                 | <b>Outcomes:</b><br>Arrhythmia<br>Cardiovascular outcomes<br>All-cause mortality<br>Ischaemic heart disease<br>Athletes heart<br>Cardiomyopathy<br>Cardiovascular disease |

## Supplement 2: Search strategy

### OID

### EMBASE

---

|                                                                                                                                                                                                   |                                                                                                                                                                                                      |
|---------------------------------------------------------------------------------------------------------------------------------------------------------------------------------------------------|------------------------------------------------------------------------------------------------------------------------------------------------------------------------------------------------------|
| 1. (exercis* or physical activity or training or exercise training).mp.                                                                                                                           | 1. (exercis* or physical activity or training or exercise training).ti,ab                                                                                                                            |
| 2. ((high or prolong* or sustained or vigorous or increas*) and dos*).mp.                                                                                                                         | 2. ((high or prolong* or sustained or vigorous or increas*) and dos*).ti,ab                                                                                                                          |
| 3. (marathon or cross country ski* or iron man* or triath* or ultra distance or endurance cycl* or endurance row* or endurance kayak* or olympi* or professional athlete or elite performance).mp | 3. (marathon or cross country ski* or iron man* or triath* or ultra distance or endurance cycl* or endurance row* or endurance kayak* or olympi* or professional athlete or elite performance).ti,ab |
| 4. (colleg* or university or club or recreational).mp.                                                                                                                                            | 4. (colleg* or university or club or recreational).ti,ab                                                                                                                                             |
| 5. (cycl* or row* or swim* or kayak* or run* or aerobic or endurance).mp.                                                                                                                         | 5. (cycl* or row* or swim* or kayak* or run* or aerobic or endurance).ti,ab                                                                                                                          |
| 6. arrhythmia*.mp. or exp Arrhythmias, Cardiac/ or arrhythmia cardiac.mp.                                                                                                                         | 6. arrhythmia*.ti,ab or exp Heart arrhythmia/ or arrhythmia cardiac.ti,ab                                                                                                                            |
| 7. (tachyarrhythmia or tachycardia).mp. or exp Tachycardia/                                                                                                                                       | 7. (tachyarrhythmia or tachycardia).ti,ab or exp Tachycardia/                                                                                                                                        |
| 8. (bradycardia or bradyarrhythmia).mp. or exp Bradycardia/                                                                                                                                       | 8. (bradycardia or bradyarrhythmia).ti,ab or exp Bradycardia/                                                                                                                                        |
| 9. ECG chang*.mp.                                                                                                                                                                                 | 9. ECG chang*.ti,ab                                                                                                                                                                                  |
| 10. Heart block.mp. or exp Heart Block/                                                                                                                                                           | 10. Heart block.ti,ab or exp Heart Block/                                                                                                                                                            |
| 11. (cardiovascular disease* or heart disease*).mp. or Cardiovascular Diseases/ or cardiovascular outcome*.mp.                                                                                    | 11. (cardiovascular disease* or heart disease*).ti,ab or Cardiovascular Disease/ or cardiovascular outcome*.ti,ab                                                                                    |

- |                                                                                                                                                                                                                                                        |                                                                                                               |
|--------------------------------------------------------------------------------------------------------------------------------------------------------------------------------------------------------------------------------------------------------|---------------------------------------------------------------------------------------------------------------|
| 12. (Cardiovascular adj5 mortality).mp.                                                                                                                                                                                                                | 12. (Cardiovascular adj5 mortality).ti,ab                                                                     |
| 13. isch* heart disease.mp. or Myocardial<br>Ischaemia/ or myocardial isch*.mp. or<br>Myocardial Infarction/                                                                                                                                           | 13. isch* heart disease.ti,ab or Heart muscle<br>ischemia / or myocardial isch*.ti,ab or Heart<br>infarction/ |
| 14. cardiomyopath*.mp. or exp<br>Cardiomyopathies/                                                                                                                                                                                                     | 14. cardiomyopath*.ti,ab or exp<br>Cardiomyopathy/                                                            |
| 15. athlete* heart.mp. or Hypertrophy, Left<br>Ventricular/ or Hypertrophy, Right Ventricular/<br>or Arrhythmogenic Right Ventricular<br>Dysplasia/ or Cardiomyopathy, Hypertrophic/<br>or Cardiomyopathy, Restrictive/ or<br>Cardiomyopathy, Dilated/ | 15. athlete* heart.ti,ab or exp Heart<br>hypertrophy/ or heart right ventricle dysplasia/                     |
| 16. heart failure.mp. or Heart Failure/                                                                                                                                                                                                                | 16. heart failure.ti,ab or exp Heart Failure/                                                                 |
| 17. 1 and 2                                                                                                                                                                                                                                            | 17. 1 and 2                                                                                                   |
| 18. 4 and 17                                                                                                                                                                                                                                           | 18. 4 and 17                                                                                                  |
| 19. 5 and 17                                                                                                                                                                                                                                           | 19. 5 and 17                                                                                                  |
| 20. 6 or 7 or 8 or 9 or 10 or 11 or 12 or 13 or<br>14 or 15 or 16                                                                                                                                                                                      | 20. 6 or 7 or 8 or 9 or 10 or 11 or 12 or 13 or<br>14 or 15 or 16                                             |
| 21. 3 or 18 or 19                                                                                                                                                                                                                                      | 21. 3 or 18 or 19                                                                                             |
| 22. 20 and 21                                                                                                                                                                                                                                          | 22. 20 and 21                                                                                                 |

### Supplement 3 – Impact of excluding the largest studies

| <b>Number of Studies<br/>Excluded (in size order)</b> | <b>Percentage Female<br/>Recruitment</b> |
|-------------------------------------------------------|------------------------------------------|
| 1                                                     | 40.3%                                    |
| 2                                                     | 41.6%                                    |
| 3                                                     | 43.8%                                    |
| 4                                                     | 38.7%                                    |
| 5                                                     | 43.0%                                    |
| 6                                                     | 36.2%                                    |
| 7                                                     | 35.1%                                    |
| 8                                                     | 24.6%                                    |
| 9                                                     | 28.8%                                    |
| 10                                                    | 18.8%                                    |
| 11                                                    | 14.8%                                    |
| 12                                                    | 16.4%                                    |
| 13                                                    | 17.9%                                    |
| 14                                                    | 19.6%                                    |
| 15                                                    | 21.5%                                    |
| 16                                                    | 19.0%                                    |
| 17                                                    | 20.6%                                    |
| 18                                                    | 21.6%                                    |
| 19                                                    | 20.6%                                    |
| 20                                                    | 22.1%                                    |

## Supplement 4 – Bibliography of all studies included in analysis

1. Abdullah SM, Barkley KW, Bhella PS, et al. Lifelong Physical Activity Regardless of Dose Is Not Associated With Myocardial Fibrosis. *Circulation Cardiovascular imaging* 2016;9(11)
2. Aengevaeren VL, Mosterd A, Braber TL, et al. Relationship Between Lifelong Exercise Volume and Coronary Atherosclerosis in Athletes. *Circulation* 2017;136(2):138-48.
3. Andersen K, Farahmand B, Ahlbom A, et al. Risk of arrhythmias in 52 755 long-distance cross-country skiers: a cohort study. *European heart journal* 2013;34(47):3624-31.
4. Andersson J, Jansson J-H, Hellsten G, et al. Effects of heavy endurance physical exercise on inflammatory markers in non-athletes. *Atherosclerosis* 2010;209(2):601-5.
5. Antero-Jacquemin J, Desgorces FD, Dor F, et al. Row for your life: a century of mortality follow-up of French olympic rowers. *PLoS one* 2014;9(11):e113362.
6. Antero-Jacquemin J, Pohar-Perme M, Rey G, et al. The heart of the matter: years-saved from cardiovascular and cancer deaths in an elite athlete cohort with over a century of follow-up. *European journal of epidemiology* 2018;33(6):531-43.
7. Antero-Jacquemin J, Rey G, Marc A, et al. Mortality in female and male French Olympians: a 1948-2013 cohort study. *The American journal of sports medicine* 2015;43(6):1505-12.
8. Apple FS, McGue MK. Serum enzyme changes during marathon training. *American Journal of Clinical Pathology* 1983;79(6):716-9.

9. Apple FS, Quist HE, Otto AP, et al. Release characteristics of cardiac biomarkers and ischemia-modified albumin as measured by the albumin cobalt-binding test after a marathon race. *Clinical chemistry* 2002;48(7):1097-100.

10. Apple FS, Rogers MA, Sherman WM, et al. Comparison of serum creatine kinase and creatine kinase MB activities post marathon race versus post myocardial infarction. *Clinica chimica acta; international journal of clinical chemistry* 1984;138(1):111-8.

11. Arem H, Moore SC, Patel A, et al. Leisure time physical activity and mortality: a detailed pooled analysis of the dose-response relationship. *JAMA internal medicine* 2015;175(6):959-67.

12. Banfi G, Lippi G, Susta D, et al. NT-proBNP concentrations in mountain marathoners. *Journal of strength and conditioning research* 2010;24(5):1369-72.

13. Banfi G, Migliorini S, Dolci A, et al. B-type natriuretic peptide in athletes performing an Olympic triathlon. *The Journal of sports medicine and physical fitness* 2005;45(4):529-31.

14. Belonje A, Nangrahary M, de Swart H, et al. Major adverse cardiac events during endurance sports. *The American journal of cardiology* 2007;99(6):849-51.

15. Bennekens JH, van Mechelen R, Meijer A. Pacemaker safety and long-distance running. *Netherlands heart journal : monthly journal of the Netherlands Society of Cardiology and the Netherlands Heart Foundation* 2004;12(10):450-54.

16. Bergstrom E, Hernell O, Persson LA. Endurance running performance in relation to cardiovascular risk indicators in adolescents. *International journal of sports medicine* 1997;18(4):300-7.

17. Bernardino G, Sanz de la Garza M, Domenech-Ximenes B, et al. Three-dimensional regional bi-ventricular shape remodeling is associated with exercise capacity in endurance athletes. *European journal of applied physiology* 2020;120(6):1227-35.
18. Biffi A, Ansalone G, Verdile L, et al. Ventricular arrhythmias and athlete's heart. Role of signal-averaged electrocardiography. *Eur Heart J* 1996;17(4):557-63. doi: 10.1093/oxfordjournals.eurheartj.a014909
19. Biffi A, Verdile L, Ansalone G, et al. Lack of correlation between ventricular late potentials and left ventricular mass in top-level male athletes. *Med Sci Sports Exerc* 1999;31(3):359-61. doi: 10.1097/00005768-199903000-00001
20. Bjerring AW, Landgraff HE, Leirstein S, et al. Morphological changes and myocardial function assessed by traditional and novel echocardiographic methods in preadolescent athlete's heart. *European journal of preventive cardiology* 2018;25(9):1000-07.
21. Bjerring AW, Landgraff HE, Leirstein S, et al. From talented child to elite athlete: The development of cardiac morphology and function in a cohort of endurance athletes from age 12 to 18. *European journal of preventive cardiology* 2020:2047487320921317.
22. Bjerring AW, Landgraff HE, Stokke TM, et al. The developing athlete's heart: a cohort study in young athletes transitioning through adolescence. *European journal of preventive cardiology* 2019;26(18):2001-08.
23. Bonsignore A, Bredin SSD, Wollmann H, et al. The influence of race length on arterial compliance following an ultra-endurance marathon. *European journal of sport science* 2017;17(4):441-46.

24. Breuckmann F, Mohlenkamp S, Sievers B, et al. Myocardial late gadolinium enhancement: Prevalence, pattern, and prognostic relevance in marathon runners. 2009;251(1):50-57.
25. Calvo N, Ramos P, Montserrat S, et al. Emerging risk factors and the dose-response relationship between physical activity and lone atrial fibrillation: a prospective case-control study. *Europace : European pacing, arrhythmias, and cardiac electrophysiology : journal of the working groups on cardiac pacing, arrhythmias, and cardiac cellular electrophysiology of the European Society of Cardiology* 2016;18(1):57-63.
26. Carlsson M, Ugander M, Mosen H, et al. Atrioventricular plane displacement is the major contributor to left ventricular pumping in healthy adults, athletes, and patients with dilated cardiomyopathy. *American journal of physiology Heart and circulatory physiology* 2007;292(3):H1452-9.
27. Caselli S, Autore C, Serdoz A, et al. Three-dimensional echocardiographic characterization of patients with left ventricular noncompaction. *Journal of the American Society of Echocardiography : official publication of the American Society of Echocardiography* 2012;25(2):203-9.
28. Caselli S, Di Paolo FM, Picicchio C, et al. Patterns of left ventricular diastolic function in Olympic athletes. *Journal of the American Society of Echocardiography : official publication of the American Society of Echocardiography* 2015;28(2):236-44.
29. Caselli S, Di Paolo FM, Picicchio C, et al. Patterns of left ventricular longitudinal strain and strain rate in olympic athletes. 2015;28(2):245-53.



30. Claessens C, Claessens P, Bloemen H, et al. Structural heart adaptations in triathletes. *Acta cardiologica* 1999;54(6):317-25.
31. Claessens C, Claessens P, Claessens M, et al. Echocardiographic and physiological performance characteristics of triathletes. 2000;16(8):993-1002.
32. Claessens P, Claessens C, Claessens M, et al. Ventricular premature beats in triathletes: Still a physiological phenomenon? 1999;92(1):28-38.
33. Claessens P, Claessens C, Claessens M, et al. Physiological or pseudophysiological ECG changes in endurance-trained athletes. *Heart and vessels* 2000;15(4):181-90.
34. Claessens PJM, Claessens CWF, Claessens MMM, et al. Supernormal left ventricular diastolic function in triathletes. 2001;28(2):102-10.
35. Clauss S, Wakili R, Hildebrand B, et al. MicroRNAs as Biomarkers for Acute Atrial Remodeling in Marathon Runners (The miRathon Study--A Sub-Study of the Munich Marathon Study). *PloS one* 2016;11(2):e0148599.
36. Conti V, Corbi G, Russomanno G, et al. Oxidative stress effects on endothelial cells treated with different athletes' sera. *Medicine and science in sports and exercise* 2012;44(1):39-49.
37. Cubeddu LX, Rodriguez-Plaza LG, Alfieri AB. Urinary excretion of nitric oxide metabolites in runners, sedentary individuals and patients with coronary artery disease: Effects of 42 km marathon, 15 km race and a cardiac rehabilitation program. 1997;4(5):367-72.

38. D'Ascenzi F, Caselli S, Alvino F, et al. Cardiovascular risk profile in Olympic athletes: an unexpected and underestimated risk scenario. *British journal of sports medicine* 2019;53(1):37-42.
39. D'Ascenzi F, Pisicchio C, Caselli S, et al. RV Remodeling in Olympic Athletes. *JACC Cardiovascular imaging* 2017;10(4):385-93.
40. D'Silva A, Bhuvana AN, van Zalen J, et al. Cardiovascular Remodeling Experienced by Real-World, Unsupervised, Young Novice Marathon Runners. *Frontiers in physiology* 2020;11:232.
41. D'Silva A, Captur G, Bhuvana AN, et al. Recreational marathon running does not cause exercise-induced left ventricular hypertrabeculation. *International journal of cardiology* 2020
42. Dalla Vecchia L, Traversi E, Porta A, et al. On site assessment of cardiac function and neural regulation in amateur half marathon runners. 2014;1(1)
43. Damm S, Andersson LG, Henriksen E, et al. Wall motion abnormalities in male elite orienteers are aggravated by exercise. *Clinical physiology (Oxford, England)* 1999;19(2):121-6.
44. Date H, Imamura T, Onitsuka H, et al. Differential increase in natriuretic peptides in elite dynamic and static athletes. *Circulation journal : official journal of the Japanese Circulation Society* 2003;67(8):691-6.
45. Davis CK, Dyar DA, Vargas LA, et al. Cardiovascular and Musculoskeletal Assessment of Elite US Volleyball Players. *Clinical journal of sport medicine : official journal of the Canadian Academy of Sport Medicine* 2015;25(6):546-50.

46. Dawkins TG, Shave RE, Baggish AL, et al. Electrocardiographic changes following six months of long-distance triathlon training in previously recreationally active individuals. *European journal of sport science* 2019;1-10.
47. Demirelli S, Sam CT, Ermis E, et al. Long-Term Cardiac Remodeling in Elite Athletes: Assessment by Tissue Doppler and Speckle Tracking Echocardiography. *Echocardiography (Mount Kisco, NY)* 2015;32(9):1367-73.
48. Denham J, Nelson CP, O'Brien BJ, et al. Longer leukocyte telomeres are associated with ultra-endurance exercise independent of cardiovascular risk factors. *PloS one* 2013;8(7):e69377.
49. Deshaies Y, Allard C. Serum high-density lipoprotein cholesterol in male and female Olympic athletes. *Medicine and science in sports and exercise* 1982;14(3):207-11.
50. Draheim CC, Williams DP, McCubbin JA. Cardiovascular disease risk factor differences between Special Olympians and Non-Special Olympians. 2003;20(2):118-33.
51. Dressendorfer RH, Hauser AM, Timmis GC. Reversal of runner's bradycardia with training overstress. *Clinical journal of sport medicine : official journal of the Canadian Academy of Sport Medicine* 2000;10(4):279-85.
52. Dupont A-C, Poussel M, Hossu G, et al. Aortic compliance variation in long male distance triathletes: A new insight into the athlete's artery? *Journal of science and medicine in sport* 2017;20(6):539-42.

53. Durand G, Tsismenakis AJ, Jahnke SA, et al. Firefighters' physical activity: relation to fitness and cardiovascular disease risk. *Medicine and science in sports and exercise* 2011;43(9):1752-9.
54. Edwards M, Loprinzi P. The Dose-Response Association Between Reported Moderate to Vigorous Intensity Physical Activity and Atherogenic Index of Plasma: NHANES, 1999-2006. *Journal of physical activity & health* 2019;16(5):368-70.
55. Franco V, Callaway C, Salcido D, et al. Characterization of electrocardiogram changes throughout a marathon. *European journal of applied physiology* 2014;114(8):1725-35.
56. Franzen E, Mangold S, Erz G, et al. Comparison of morphological and functional adaptations of the heart in highly trained triathletes and long-distance runners using cardiac magnetic resonance imaging. *Heart and vessels* 2013;28(5):626-31.
57. Furlanello F, Bertoldi A, Dallago M, et al. Atrial fibrillation in elite athletes. *Journal of cardiovascular electrophysiology* 1998;9(8 Suppl):S63-8.
58. Gabrielli L, Herrera S, Contreras-Briceno F, et al. Increased active phase atrial contraction is related to marathon runner performance. *European journal of applied physiology* 2018;118(9):1931-39.
59. Galetta F, Franzoni F, Santoro G, et al. QT dispersion in elderly athletes with left ventricular hypertrophy. *Int J Sports Med* 2003;24(4):233-7. doi: 10.1055/s-2003-39499
60. Gaudreault V, Tizon-Marcos H, Poirier P, et al. Transient myocardial tissue and function changes during a marathon in less fit marathon runners. *The Canadian journal of cardiology* 2013;29(10):1269-76.

61. Ginsburg GS, Agil A, O'Toole M, et al. Effects of a single bout of ultraendurance exercise on lipid levels and susceptibility of lipids to peroxidation in triathletes. *JAMA* 1996;276(3):221-5.
62. Ginsburg GS, O'Toole M, Rimm E, et al. Gender differences in exercise-induced changes in sex hormone levels and lipid peroxidation in athletes participating in the Hawaii Ironman triathlon. Ginsburg-gender and exercise-induced lipid peroxidation. *Clinica chimica acta; international journal of clinical chemistry* 2001;305(1-2):131-9.
63. Grabs V, Peres T, Zelger O, et al. Decreased prevalence of cardiac arrhythmias during and after vigorous and prolonged exercise in healthy male marathon runners. *American heart journal* 2015;170(1):149-55.
64. Gram AS, Bladbjerg E-M, Skov J, et al. Three months of strictly controlled daily endurance exercise reduces thrombin generation and fibrinolytic risk markers in younger moderately overweight men. *European journal of applied physiology* 2015;115(6):1331-8.
65. Grimsmo J, Grundvold I, Maehlum S, et al. High prevalence of atrial fibrillation in long-term endurance cross-country skiers: echocardiographic findings and possible predictors--a 28-30 years follow-up study. *European journal of cardiovascular prevention and rehabilitation : official journal of the European Society of Cardiology, Working Groups on Epidemiology & Prevention and Cardiac Rehabilitation and Exercise Physiology* 2010;17(1):100-5.
66. Grimsmo J, Maehlum S, Moelstad P, et al. Mortality and cardiovascular morbidity among long-term endurance male cross country skiers followed for 28-30 years. *Scandinavian journal of medicine & science in sports* 2011;21(6):e351-8.

67. Haeusler KG, Herm J, Kunze C, et al. Rate of cardiac arrhythmias and silent brain lesions in experienced marathon runners: rationale, design and baseline data of the Berlin Beat of Running study. *BMC cardiovascular disorders* 2012;12:69.
68. Hallmarker U, Michaelsson K, Arnlov J, et al. Risk of recurrent ischaemic events after myocardial infarction in long-distance ski race participants. *European journal of preventive cardiology* 2016;23(3):282-90.
69. Hanssen H, Keithahn A, Hertel G, et al. Magnetic resonance imaging of myocardial injury and ventricular torsion after marathon running. *Clinical science (London, England : 1979)* 2011;120(4):143-52.
70. Harris KM, Creswell LL, Haas TS, et al. Death and Cardiac Arrest in U.S. Triathlon Participants, 1985 to 2016: A Case Series. *Annals of internal medicine* 2017;167(8):529-35.
71. Hattasch R, Spethmann S, de Boer RA, et al. Galectin-3 increase in endurance athletes. *European journal of preventive cardiology* 2014;21(10):1192-9.
72. Hawkins MN, Barnes Q, Purkayastha S, et al. The effects of aerobic fitness and beta1-adrenergic receptor blockade on cardiac work during dynamic exercise. *Journal of applied physiology (Bethesda, Md : 1985)* 2009;106(2):486-93.
73. Heinz L, Sax A, Robert F, et al. T-wave variability detects abnormalities in ventricular repolarization: a prospective study comparing healthy persons and Olympic athletes. *Annals of noninvasive electrocardiology : the official journal of the International Society for Holter and Noninvasive Electrocardiology, Inc* 2009;14(3):276-9.

74. Henriksen E, Landelius J, Wesslen L, et al. Echocardiographic right and left ventricular measurements in male elite endurance athletes. *European heart journal* 1996;17(7):1121-8.

75. Her AY, Kim J-Y, Choi E-Y, et al. Value of ventricular stiffness index and ventriculoarterial interaction in patients with nonischemic dilated cardiomyopathy. *Circulation journal : official journal of the Japanese Circulation Society* 2009;73(9):1683-90.

76. Herm J, Topper A, Wutzler A, et al. Frequency of exercise-induced ST-T-segment deviations and cardiac arrhythmias in recreational endurance athletes during a marathon race: results of the prospective observational Berlin Beat of Running study. *BMJ open* 2017;7(8):e015798.

77. Herrmann M, Schorr H, Obeid R, et al. Homocysteine increases during endurance exercise. *2003;41(11):1518-24.*

78. Hildick-Smith DJ, Johnson PJ, Wisbey CR, et al. Coronary flow reserve is supranormal in endurance athletes: an adenosine transthoracic echocardiographic study. *Heart* 2000;84(4):383-9. doi: 10.1136/heart.84.4.383

79. Hirata Y, Kusunose K, Yamada H, et al. Left atrial functional response after a marathon in healthy amateur volunteers. *The international journal of cardiovascular imaging* 2019;35(4):633-43.

80. Hochsmann C, Dorling JL, Apolzan JW, et al. Effect of different doses of supervised aerobic exercise on heart rate recovery in inactive adults who are overweight or obese: results from E-MECHANIC. *European journal of applied physiology* 2019;119(9):2095-103.

81. Hosatte-Ducassy C, Mohindra R, Marton G, et al. Electrocardiographic changes after completion of a triathlon. 2020

82. Iellamo F, Manzi V, Caminiti G, et al. Dose-response relationship of baroreflex sensitivity and heart rate variability to individually-tailored exercise training in patients with heart failure. *International journal of cardiology* 2013;166(2):334-9.

83. Iellamo F, Manzi V, Caminiti G, et al. Matched dose interval and continuous exercise training induce similar cardiorespiratory and metabolic adaptations in patients with heart failure. *International journal of cardiology* 2013;167(6):2561-5.

84. Imai K, Sato H, Hori M, et al. Vagally mediated heart rate recovery after exercise is accelerated in athletes but blunted in patients with chronic heart failure. *Journal of the American College of Cardiology* 1994;24(6):1529-35.

85. Indermuhle A, Vogel R, Meier P, et al. The relative myocardial blood volume differentiates between hypertensive heart disease and athlete's heart in humans. *European heart journal* 2006;27(13):1571-8.

86. Indermuhle A, Vogel R, Rutz T, et al. Myocardial contrast echocardiography for the distinction of hypertrophic cardiomyopathy from athlete's heart and hypertensive heart disease. *Swiss medical weekly* 2009;139(47-48):691-8.

87. Iwasaki K-I, Zhang R, Zuckerman JH, et al. Dose-response relationship of the cardiovascular adaptation to endurance training in healthy adults: how much training for what benefit? *Journal of applied physiology (Bethesda, Md : 1985)* 2003;95(4):1575-83.



88. Jin M-N, Yang P-S, Song C, et al. Physical Activity and Risk of Atrial Fibrillation: A Nationwide Cohort Study in General Population. *Scientific reports* 2019;9(1):13270.
89. Jouffroy R, Caille V, Vieillard-Baron A, et al. Changes of cardiac function during ultradistance trail running. 2015;116(8):1284-89.
90. Kaleta AM, Lewicka E, Dabrowska-Kugacka A, et al. Electrocardiographic abnormalities in amateur male marathon runners. *Advances in clinical and experimental medicine : official organ Wroclaw Medical University* 2018;27(8):1091-98.
91. Karlstedt E, Chelvanathan A, Da Silva M, et al. The impact of repeated marathon running on cardiovascular function in the aging population. *Journal of cardiovascular magnetic resonance : official journal of the Society for Cardiovascular Magnetic Resonance* 2012;14:58.
92. Karstoft K, Solomon TP, Laye MJ, et al. Daily marathon running for a week--the biochemical and body compositional effects of participation. *Journal of strength and conditioning research* 2013;27(11):2927-33.
93. Kasikcioglu E, Oflaz H, Oncul A, et al. The trivest in overreaching syndrome: cardiac fatigue, muscular weakness, and vascular dysfunction. *International journal of cardiology* 2008;127(3):417-9.
94. Ketelhut RG, Ketelhut K, Messerli FH, et al. Fitness in the fit: does physical conditioning affect cardiovascular risk factors in middle-aged marathon runners? *European heart journal* 1996;17(2):199-203.

95. Kettunen JA, Kujala UM, Kaprio J, et al. All-cause and disease-specific mortality among male, former elite athletes: an average 50-year follow-up. *British journal of sports medicine* 2015;49(13):893-7.
96. Kim JH, Malhotra R, Chiampas G, et al. Cardiac arrest during long-distance running races. *The New England journal of medicine* 2012;366(2):130-40.
97. Kim YJ, Goh CW, Byun YS, et al. Left ventricular hypertrophy, diastolic dysfunction, pulse pressure, and plasma ET-1 in marathon runners with exaggerated blood pressure response. *International heart journal* 2013;54(2):82-7.
98. Kim YJ, Park Y, Lee YH, et al. Relationship of exercise habits and cardiac events to resting blood pressure in middle-aged amateur marathoners. 2014;173(5):273-81.
99. Kokkinos PF, Holland JC, Narayan P, et al. Miles run per week and HDL-C levels in healthy, middle-aged men: A dose- response relationship. 1995;16(8):10-15.
100. Koller A, Sumann G, Griesmacher A, et al. Cardiac troponins after a downhill marathon. 2008;129(3):449-52.
101. Konopka M, Burkhard-Jagodzincka K, Aniol-Strzyzewska K, et al. Prevalence and determinants of the early repolarisation pattern in a group of young high endurance rowers. *Kardiologia polska* 2016;74(3):289-99.
102. Kostka T, Drygas W, Mrozek P. [Physiological characteristics and the level of risk factors for ischemic heart disease in marathon runners between 30 and 59 years of age]. *Charakterystyka fizjologiczna oraz poziom czynnikow zagrozenia choroba niedokrwienna serca u biegaczy maratoncezykow w wieku 30-59 lat* 1989;44(6):144-6.

103. Krol W, Braksator W, Kasprzak JD, et al. The influence of extreme mixed exertion load on the right ventricular dimensions and function in elite athletes: a tissue Doppler study. *Echocardiography (Mount Kisco, NY)* 2011;28(7):753-60.
104. Krumm P, Kraus S, Mangold S, et al. Mid-term development of the right ventricle in competitive athletes. *Acta radiologica (Stockholm, Sweden : 1987)* 2018;59(12):1422-30.
105. Kunutsor SK, Makikallio TH, Kauhanen J, et al. Leisure-time cross-country skiing is associated with lower incidence of type 2 diabetes: A prospective cohort study. *Diabetes/metabolism research and reviews* 2020;36(1):e3216.
106. Kunutsor SK, Makikallio TH, Kauhanen J, et al. Leisure-time cross-country skiing is associated with lower incidence of hypertension: a prospective cohort study. *Journal of hypertension* 2019;37(8):1624-32.
107. Lacey B, Golledge J, Yeap BB, et al. Physical activity and vascular disease in a prospective cohort study of older men: The Health In Men Study (HIMS). *BMC geriatrics* 2015;15:164.
108. Lalande S, Baldi JC. Left ventricular mass in elite olympic weight lifters. *The American journal of cardiology* 2007;100(7):1177-80.
109. Leckie T, Richardson A, Watkins E, et al. High-sensitivity troponin T in marathon runners, marathon runners with heart disease and collapsed marathon runners. *Scandinavian journal of medicine & science in sports* 2019;29(5):663-68.

110. Legaz Arrese A, Serrano Ostariz E, Gonzalez Carretero M, et al. Echocardiography to measure fitness of elite runners. *Journal of the American Society of Echocardiography* : official publication of the American Society of Echocardiography 2005;18(5):419-26.
111. Leischik R, Spelsberg N. Endurance sport and "cardiac injury": A prospective study of recreational ironman athletes. 2014;11(9):9082-100.
112. Leischik R, Spelsberg N, Niggemann H, et al. Exercise-induced arterial hypertension - an independent factor for hypertrophy and a ticking clock for cardiac fatigue or atrial fibrillation in athletes? 2014;3
113. Lemez S, Wattie N, Baker J. Early death in active professional athletes: Trends and causes. *Scandinavian journal of medicine & science in sports* 2016;26(5):544-9.
114. Lewicka-Potocka Z, Dabrowska-Kugacka A, Lewicka E, et al. The "athlete's heart" features in amateur male marathon runners. *Cardiology journal* 2020
115. Lie H, Erikssen J. ECG aberrations, latent coronary heart disease and cardiopulmonary fitness in various age groups of Norwegian cross-country skiers. *Acta medica Scandinavica* 1978;203(6):503-7.
116. Lie H, Erikssen J. Five-year follow-up of ECG aberrations, latent coronary heart disease and cardiopulmonary fitness in various age groups of Norwegian cross-country skiers. *Acta medica Scandinavica* 1984;216(4):377-83.
117. Lie H, Mundal R, Erikssen J. Coronary risk factors and incidence of coronary death in relation to physical fitness. Seven-year follow-up study of middle-aged and elderly men. *European heart journal* 1985;6(2):147-57.

118. Lippi G, Schena F, Salvagno GL, et al. Comparison of the lipid profile and lipoprotein(a) between sedentary and highly trained subjects. *Clinical chemistry and laboratory medicine* 2006;44(3):322-6.

119. Lippi G, Schena F, Salvagno GL, et al. Influence of a half-marathon run on NT-proBNP and troponin T. *Clinical laboratory* 2008;54(7-8):251-4.

120. Lippi G, Schena F, Salvagno GL, et al. A half-marathon run does not acutely influence lipoprotein(a). *Nutrition, metabolism, and cardiovascular diseases : NMCD* 2008;18(7):e37-8.

121. Loprinzi PD. Dose-response association of moderate-to-vigorous physical activity with cardiovascular biomarkers and all-cause mortality: Considerations by individual sports, exercise and recreational physical activities. *Preventive medicine* 2015;81:73-7.

122. Lord R, Somauroo J, Stembridge M, et al. The right ventricle following ultra-endurance exercise: insights from novel echocardiography and 12-lead electrocardiography. *European journal of applied physiology* 2015;115(1):71-80.

123. Lucia A, Moran M, Perez M, et al. Short-term effects of marathon running in master runners: no evidence of myocardial injury. *International journal of sports medicine* 1999;20(7):482-6.

124. Luurila OJ, Karjalainen J, Viitasalo M, et al. Arrhythmias and ST segment deviation during prolonged exhaustive exercise (ski marathon) in healthy middle-aged men. *European heart journal* 1994;15(4):507-13.

125. Major Z, Kirschner R, Medvegy N, et al. The importance of ST elevation in V2-4 ECG leads in athletes. *Physiology international* 2019;106(4):368-78.
126. Makan J, Sharma S, Firoozi S, et al. Physiological upper limits of ventricular cavity size in highly trained adolescent athletes. *Heart (British Cardiac Society)* 2005;91(4):495-9.
127. Malek LA, Barczuk-Falecka M, Werys K, et al. Cardiovascular magnetic resonance with parametric mapping in long-term ultra-marathon runners. *European journal of radiology* 2019;117:89-94.
128. Mango F, Caselli S, Luchetti A, et al. Low QRS voltages in Olympic athletes: Prevalence and clinical correlates. *European journal of preventive cardiology* 2020:2047487320914758.
129. Marijon E, Tafflet M, Antero-Jacquemin J, et al. Mortality of French participants in the Tour de France (1947-2012). *European heart journal* 2013;34(40):3145-50.
130. Maron BJ, Klues HG. Surviving competitive athletics with hypertrophic cardiomyopathy. *The American journal of cardiology* 1994;73(15):1098-104.
131. Maron BJ, Pelliccia A, Spataro A, et al. Reduction in left ventricular wall thickness after deconditioning in highly trained Olympic athletes. *British heart journal* 1993;69(2):125-8.
132. Martin-Beaulieu JP, Myrick KM, Martin T, et al. Common electrocardiogram variations pre- and post-marathon. *Clinical case reports* 2016;4(10):944-47.

133. Martinez-Mas ML, Javier Chorro F, Sanchis J, et al. Doppler assessment of left ventricular diastolic function in marathon runners. *The Journal of sports medicine and physical fitness* 1994;34(1):50-5.
134. Mathews SC, Narotsky DL, Bernholt DL, et al. Mortality among marathon runners in the United States, 2000-2009. *The American journal of sports medicine* 2012;40(7):1495-500.
135. Matsuo S, Nakamura Y, Takahashi M, et al. Cardiac sympathetic dysfunction in an athlete's heart detected by 123I-metaiodobenzylguanidine scintigraphy. *Japanese circulation journal* 2001;65(5):371-4.
136. Mattusch F, Dufaux B, Heine O, et al. Reduction of the plasma concentration of C-reactive protein following nine months of endurance training. *International journal of sports medicine* 2000;21(1):21-4.
137. Mayet J, Kanagaratnam P, Shahi M, et al. QT dispersion in athletic left ventricular hypertrophy. *American heart journal* 1999;137(4 Pt 1):678-81.
138. McClean G, George K, Lord R, et al. Chronic adaptation of atrial structure and function in elite male athletes. *European heart journal cardiovascular Imaging* 2015;16(4):417-22.
139. Merghani A, Cox AT, Dhutia H, et al. Prevalence of Subclinical Coronary Artery Disease in Masters Endurance Athletes with a Low Atherosclerotic Risk Profile. 2017;136(2):126-37.
140. Middleton N, Shave R, George K, et al. Novel application of flow propagation velocity and ischaemia-modified albumin in analysis of postexercise cardiac function in man. *Experimental physiology* 2006;91(3):511-9.

141. Milvy P. Statistical analysis of deaths from coronary heart disease anticipated in a cohort of marathon runners. *Annals of the New York Academy of Sciences* 1977;301:620-6.
142. Minns AB, McFarland C, Strachan M, et al. Electrocardiogram and echocardiogram findings in runners completing a half marathon. *The American journal of emergency medicine* 2011;29(9):1182-7.
143. Miranda JO, Lopez DT. Modificaciones anatomicas del ventriculo izquierdo en deportistas de canotaje de alto rendimientoAnatomical modifications of the left ventricle in high performance canoeing athletes. 2020;19(1):76-91.
144. Mohlenkamp S, Leineweber K, Lehmann N, et al. Coronary atherosclerosis burden, but not transient troponin elevation, predicts long-term outcome in recreational marathon runners. *Basic research in cardiology* 2014;109(1):391.
145. Molina L, Mont L, Marrugat J, et al. Long-term endurance sport practice increases the incidence of lone atrial fibrillation in men: a follow-up study. *Europace : European pacing, arrhythmias, and cardiac electrophysiology : journal of the working groups on cardiac pacing, arrhythmias, and cardiac cellular electrophysiology of the European Society of Cardiology* 2008;10(5):618-23.
146. Montiel G, Horn T, Vafa R, et al. Echocardiographic and biochemical analysis of cardiac function and injury among female amateur runners post-marathon. 2016;128(5):193-97.
147. Morris JN, Clayton DG, Everitt MG, et al. Exercise in leisure time: coronary attack and death rates. *British heart journal* 1990;63(6):325-34.



148. Murayama M, Kuroda Y. Cardiovascular future of athletes. 1980;29(2):117-23.

149. Musat CL, Coman M, Hincu M, et al. Etude sur les effets du stress cause par l'effort aerobe sur la fonction cardiovasculaire et la fonction hepatiche des athletes specialisees en probes de fond et grand fondA study on the effects of stress due to aerobic exertion on the cardiovascular and liver functions of athletes specializing in track running and long distance running. 2007;42(4):234-38.

150. Myrstad M, Aaronaes M, Graff-Iversen S, et al. Physical activity, symptoms, medication and subjective health among veteran endurance athletes with atrial fibrillation. Clinical research in cardiology : official journal of the German Cardiac Society 2016;105(2):154-61.

151. Myrstad M, Lochen ML, Graff-Iversen S, et al. Increased risk of atrial fibrillation among elderly Norwegian men with a history of long-term endurance sport practice. Scandinavian journal of medicine & science in sports 2014;24(4):e238-44.

152. Myrstad M, Nystad W, Graff-Iversen S, et al. Effect of years of endurance exercise on risk of atrial fibrillation and atrial flutter. The American journal of cardiology 2014;114(8):1229-33.

153. Nakamoto K. Electrocardiograms of 25 marathon runners before and after 100 meter dash. Japanese circulation journal 1969;33(2):105-28.

154. Nassenstein K, Breuckmann F, Lehmann N, et al. Left ventricular volumes and mass in marathon runners and their association with cardiovascular risk factors. The international journal of cardiovascular imaging 2009;25(1):71-9.

155. Nottin S, Doucende G, Tanguy S, et al. Alteration in left ventricular strains and torsional mechanics after ultralong duration exercise in athletes. 2009;2(4):323-30.
156. O'Hanlon R, Wage R, Smith G, et al. Troponin release following endurance exercise: Is inflammation the cause? A cardiovascular magnetic resonance study. 2010;12(1)
157. Ogawa S, Tabata H, Ohishi S, et al. Prognostic significance of long ventricular pauses in athletes. Japanese circulation journal 1991;55(8):761-6.
158. Ohba H, Takada H, Musha H, et al. Effects of prolonged strenuous exercise on plasma levels of atrial natriuretic peptide and brain natriuretic peptide in healthy men. American heart journal 2001;141(5):751-8.
159. Ohman EM, Teo KK, Johnson AH, et al. Abnormal cardiac enzyme responses after strenuous exercise: alternative diagnostic aids. British medical journal (Clinical research ed) 1982;285(6354):1523-6.
160. Olivier LR, de Waal A, Retief FJ, et al. Electrocardiographic and biochemical studies on marathon runners. South African medical journal = Suid-Afrikaanse tydskrif vir geneeskunde 1978;53(20):783-7.
161. Opondo MA, Aiad N, Cain MA, et al. Does High-Intensity Endurance Training Increase the Risk of Atrial Fibrillation? A Longitudinal Study of Left Atrial Structure and Function. Circulation Arrhythmia and electrophysiology 2018;11(5):e005598.
162. Paffenbarger RS, Jr., Hyde RT, Wing AL, et al. A natural history of athleticism and cardiovascular health. JAMA 1984;252(4):491-5.

163. Palazzuoli A, Puccetti L, Bruni F, et al. Diastolic filling in hypertrophied hearts of elite runners: an echo-Doppler study. *European review for medical and pharmacological sciences* 2001;5(2):65-9.
164. Palazzuoli A, Puccetti L, Pastorelli M, et al. Transmitral and pulmonary venous flow study in elite male runners and young adults. *International journal of cardiology* 2002;84(1):47-51.
165. Pavlik G, Kemeny D, Kneffel Z, et al. Echocardiographic data in hungarian top-level water polo players. *Medicine and science in sports and exercise* 2005;37(2):323-8.
166. Pelliccia A, Adami PE, Quattrini F, et al. Are Olympic athletes free from cardiovascular diseases? Systematic investigation in 2352 participants from Athens 2004 to Sochi 2014. *British journal of sports medicine* 2017;51(4):238-43.
167. Pelliccia A, Culasso F, Di Paolo FM, et al. Physiologic left ventricular cavity dilatation in elite athletes. *Annals of internal medicine* 1999;130(1):23-31.
168. Pelliccia A, De Martino L, Borrazzo C, et al. Clinical correlates and outcome of the patterns of premature ventricular beats in Olympic athletes: a long-term follow-up study. *European journal of preventive cardiology* 2020:2047487320928452.
169. Pelliccia A, Di Paolo FM, De Blasiis E, et al. Prevalence and clinical significance of aortic root dilation in highly trained competitive athletes. *Circulation* 2010;122(7):698-706.
170. Pelliccia A, Kinoshita N, Pisicchio C, et al. Long-term clinical consequences of intense, uninterrupted endurance training in olympic athletes. *Journal of the American College of Cardiology* 2010;55(15):1619-25.

171. Pelliccia A, Maron BJ, Culasso F, et al. Clinical significance of abnormal electrocardiographic patterns in trained athletes. *Circulation* 2000;102(3):278-84.
172. Pelliccia A, Maron BJ, Culasso F, et al. Athlete's heart in women. Echocardiographic characterization of highly trained elite female athletes. *JAMA* 1996;276(3):211-5.
173. Perrin T, Trachsel LD, Schneiter S, et al. Prevalence of abnormal electrocardiograms in Swiss elite athletes detected with modern screening criteria. *Swiss medical weekly* 2016;146:w14376.
174. Perseghin G, Lattuada G, Terruzzi I, et al. Effect of the sporting discipline on the right and left ventricular morphology and function of elite male track runners: A magnetic resonance imaging and phosphorus 31 spectroscopy study. 2007;154(5):937-42.
175. Petersen SE, Hudsmith LE, Robson MD, et al. Sex-specific characteristics of cardiac function, geometry, and mass in young adult elite athletes. *Journal of magnetic resonance imaging : JMRI* 2006;24(2):297-303.
176. Poh K-K, Ton-Nu T-T, Neilan TG, et al. Myocardial adaptation and efficiency in response to intensive physical training in elite speedskaters. *International journal of cardiology* 2008;126(3):346-51.
177. Radonic V, Kozmar D, Pocanic D, et al. Mortality and causes of death among Croatian male Olympic medalists. *Croatian medical journal* 2017;58(4):263-69.

178. Real JT, Merchante A, Gomez JL, et al. Effects of marathon running on plasma total homocysteine concentrations. *Nutrition, metabolism, and cardiovascular diseases : NMCD* 2005;15(2):134-9.
179. Riley-Hagan M, Peshock RM, Stray-Gundersen J, et al. Left ventricular dimensions and mass using magnetic resonance imaging in female endurance athletes. *1992;69(12):1067-74.*
180. Rimensberger C, Carlen F, Brugger N, et al. Right ventricular adaptations and arrhythmias in amateur ultra-endurance athletes. *British journal of sports medicine* 2014;48(15):1179-84.
181. Roberts WO, Roberts DM, Lunos S. Marathon related cardiac arrest risk differences in men and women. *2013;47(3):168-71.*
182. Roberts WO, Schwartz RS, Garberich RF, et al. Fifty Men, 3510 Marathons, Cardiac Risk Factors, and Coronary Artery Calcium Scores. *Medicine and science in sports and exercise* 2017;49(12):2369-73.
183. Rucker L, Drygas WK, Heyduck B. Blood platelet activation and increase in thrombin activity following a marathon race. *European journal of applied physiology and occupational physiology* 1986;55(4):374-80.
184. Rodriguez-Plaza LG, Alfieri AB, Cubeddu LX. Urinary excretion of nitric oxide metabolites in runners, sedentary individuals and patients with coronary artery disease: effects of 42 km marathon, 15 km race and a cardiac rehabilitation program. *Journal of cardiovascular risk* 1997;4(5-6):367-72.

185. Rosin B. Is marathon running toxic? An observational study of cardiovascular disease prevalence and longevity in 54 male marathon runners. *The Physician and sportsmedicine* 2017;45(2):105-09.
186. Saenz AJ, Lee-Lewandrowski E, Lewandrowski KB, et al. Measurement of a plasma stroke biomarker panel and cardiac troponin T in marathon runners before and after the 2005 Boston Marathon. 2006;126(2):185-89.
187. Sanz-de la Garza M, Grazioli G, Bijmens BH, et al. Acute, Exercise Dose-Dependent Impairment in Atrial Performance During an Endurance Race: 2D Ultrasound Speckle-Tracking Strain Analysis. *JACC Cardiovascular imaging* 2016;9(12):1380-88.
188. Sarna S, Kaprio J, Kujala UM, et al. Health status of former elite athletes. The Finnish experience. *Aging (Milan, Italy)* 1997;9(1-2):35-41.
189. Sarna S, Sahi T, Koskenvuo M, et al. Increased life expectancy of world class male athletes. *Medicine and science in sports and exercise* 1993;25(2):237-44.
190. Scharf M, Uder M, Lell MM, et al. Atrial and ventricular functional and structural adaptations of the heart in elite triathletes assessed with cardiac MR imaging. 2010;257(1):71-79.
191. Scharhag J, Herrmann M, Urhausen A, et al. Independent elevations of N-terminal pro-brain natriuretic peptide and cardiac troponins in endurance athletes after prolonged strenuous exercise. *American heart journal* 2005;150(6):1128-34.
192. Scherr C, Fabiano LCC, Guerra RL, et al. Sports Practices and Cardiovascular Risk in Teenagers. *Arquivos brasileiros de cardiologia* 2018;110(3):248-55.

193. Scherr C, Helal L, Ferrari F, et al. The Olympic Experimental Gymnasium Program and its Association with the Prevalence of Cardiovascular Risk Factors in Adolescents: A Cross-Sectional Study. *Arquivos brasileiros de cardiologia* 2019;112(6):775-81.

194. Scherr J, Schuster T, Pressler A, et al. Repolarization perturbation and hypomagnesemia after extreme exercise. *Medicine and science in sports and exercise* 2012;44(9):1637-43.

195. Shave RE, Dawson E, Whyte G, et al. Evidence of exercise-induced cardiac dysfunction and elevated cTnT in separate cohorts competing in an ultra-endurance mountain marathon race. *International journal of sports medicine* 2002;23(7):489-94.

196. Siegel AJ, Lewandrowski EL, Chun KY, et al. Changes in cardiac markers including B-natriuretic peptide in runners after the Boston marathon. 2001;88(8):920-23.

197. Siegel AJ, Lewandrowski KB, Strauss HW, et al. Normal post-race antimyosin myocardial scintigraphy in asymptomatic marathon runners with elevated serum creatine kinase MB isoenzyme and troponin T levels. Evidence against silent myocardial cell necrosis. *Cardiology* 1995;86(6):451-6.

198. Siegel AJ, Silverman LM, Evans WJ. Elevated skeletal muscle creatine kinase MB isoenzyme levels in marathon runners. *JAMA* 1983;250(20):2835-7.

199. Siegel AJ, Silverman LM, Holman BL. Elevated creatine kinase MB isoenzyme levels in marathon runners. Normal myocardial scintigrams suggest noncardiac source. *JAMA* 1981;246(18):2049-51.

200. Siegel AJ, Silverman LM, Holman BL. Normal results of post-race thallium-201 myocardial perfusion imaging in marathon runners with elevated serum MB creatine kinase levels. *The American journal of medicine* 1985;79(4):431-4.
201. Simsek Z, Hakan Tas M, Degirmenci H, et al. Speckle tracking echocardiographic analysis of left ventricular systolic and diastolic functions of young elite athletes with eccentric and concentric type of cardiac remodeling. *Echocardiography (Mount Kisco, NY)* 2013;30(10):1202-8.
202. Sivertssen E, Benestad AM, Rykke E, et al. [Is top level athletic performance dangerous? A 25-year follow-up study of 24 elite cross-country skiers]. *Er det farlig a drive toppidrett? En 25 ars etterundersokelse av 24 elitelangrennslopere* 1994;114(28):3300-4.
203. Skadberg O, Kleiven O, Bjorkavoll-Bergseth M, et al. Highly increased Troponin I levels following high-intensity endurance cycling may detect subclinical coronary artery disease in presumably healthy leisure sport cyclists: The North Sea Race Endurance Exercise Study (NEEDED) 2013. *European journal of preventive cardiology* 2017;24(8):885-94.
204. Smith GS, Vacek JL, Wilson DB, et al. Exercise-induced alterations of signal-averaged electrocardiograms in marathon runners. *American heart journal* 1989;118(6):1198-202.
205. Smith WG, Cullen KJ, Thorburn IO. ELECTROCARDIOGRAMS OF MARATHON RUNNERS IN 1962 COMMONWEALTH GAMES. *British heart journal* 1964;26:469-76.
206. Spirito P, Pelliccia A, Proschan MA, et al. Morphology of the "athlete's heart" assessed by echocardiography in 947 elite athletes representing 27 sports. *The American journal of cardiology* 1994;74(8):802-6.



207. Starekova J, Thottakara T, Lund GK, et al. Increased myocardial mass and attenuation of myocardial strain in professional male soccer players and competitive male triathletes. *The international journal of cardiovascular imaging* 2020
208. Stoggl T, Schwarzl C, Muller EE, et al. Effects of skiing on cardiorespiratory and metabolic responses in middle-aged subjects with increased cardiovascular risk. *International journal of cardiology* 2016;203:618-20.
209. Stoutenberg M, Kressler J, Chen GL, et al. Aerobic training does not alter CRP in apparently healthy, untrained men. *The Journal of sports medicine and physical fitness* 2012;52(1):53-62.
210. Stray-Gundersen J, Denke MA, Grundy SM. Influence of lifetime cross-country skiing on plasma lipids and lipoproteins. *Medicine and science in sports and exercise* 1991;23(6):695-702.
211. Svedberg N, Sundstrom J, James S, et al. Long-Term Incidence of Atrial Fibrillation and Stroke Among Cross-Country Skiers. 2019;140(11):910-20.
212. Swiatowiec A, Krol W, Kuch M, et al. Analysis of 12-lead electrocardiogram in top competitive professional athletes in the light of recent guidelines. *Kardiologia polska* 2009;67(10):1095-102.
213. Swift DL, Church TS, Earnest CP, et al. The effect of different doses of aerobic exercise training on exercise blood pressure in overweight and obese postmenopausal women. 2012;19(5):503-09.

214. Swift DL, Johannsen NM, Earnest CP, et al. Effect of different doses of aerobic exercise training on total bilirubin levels. *Medicine and science in sports and exercise* 2012;44(4):569-74.
215. Swift DL, Johannsen NM, Lavie CJ, et al. Racial differences in the response of cardiorespiratory fitness to aerobic exercise training in Caucasian and African American postmenopausal women. *Journal of applied physiology* (Bethesda, Md : 1985) 2013;114(10):1375-82.
216. Szauder I, Kovacs A, Pavlik G. Comparison of left ventricular mechanics in runners versus bodybuilders using speckle tracking echocardiography. *Cardiovascular ultrasound* 2015;13:7.
217. Tahir E, Scherz B, Starekova J, et al. Acute impact of an endurance race on cardiac function and biomarkers of myocardial injury in triathletes with and without myocardial fibrosis. *European journal of preventive cardiology* 2020;27(1):94-104.
218. Tahir E, Starekova J, Muellerleile K, et al. Myocardial Fibrosis in Competitive Triathletes Detected by Contrast-Enhanced CMR Correlates With Exercise-Induced Hypertension and Competition History. *JACC Cardiovascular imaging* 2018;11(9):1260-70.
219. Tian Y, Nie J, Tong TK, et al. Changes in serum cardiac troponins following a 21-km run in junior male runners. *The Journal of sports medicine and physical fitness* 2006;46(3):481-8.
220. Trivax JE, Franklin BA, Goldstein JA, et al. Acute cardiac effects of marathon running. *Journal of applied physiology* (Bethesda, Md : 1985) 2010;108(5):1148-53.

221. Trullas JC, Roca E, Guillermo A, et al. Ultra Pirineu 2017: características de los corredores de elite y de no elite y efectos sobre la salud de una maratón de montaña: estudio piloto Serialmed-UP Ultra Pirineu 2017: Characteristics of elite and non-elite runners and effects on health of a mountain marathon: Serialmed-UP pilot study. 2018;53(200):139-46.

222. Tsiflikas I, Thomas C, Fallmann C, et al. Prevalence of Subclinical Coronary Artery Disease in Middle-Aged, Male Marathon Runners Detected by Cardiac CT. *RoFo : Fortschritte auf dem Gebiete der Röntgenstrahlen und der Nuklearmedizin* 2015;187(7):561-8.

223. Ujka K, Bastiani L, D'Angelo G, et al. Enhanced Right-Chamber Remodeling in Endurance Ultra-Trail Athletes Compared to Marathon Runners Detected by Standard and Speckle-Tracking Echocardiography. *Frontiers in physiology* 2017;8:527.

224. van Buuren F, Mellwig KP, Butz T, et al. Left ventricular mass and oxygen uptake in top handball athletes. *International journal of sports medicine* 2013;34(3):200-6.

225. Van Buuren F, Mellwig KP, Faber L, et al. The occurrence of atrial fibrillation in former top-level handball players above the age of 50. *Acta cardiologica* 2012;67(2):213-20.

226. Vance DD, Chen GL, Stoutenberg M, et al. Cardiac performance, biomarkers and gene expression studies in previously sedentary men participating in half-marathon training. *BMC sports science, medicine & rehabilitation* 2014;6(1):6.

227. Vassalle C, Masotti S, Lubrano V, et al. Traditional and new candidate cardiac biomarkers assessed before, early, and late after half marathon in trained subjects. *European journal of applied physiology* 2018;118(2):411-17.

228. Vicent L, Ariza-Sole A, Gonzalez-Juanatey JR, et al. Exercise-related severe cardiac events. *Scandinavian journal of medicine & science in sports* 2018;28(4):1404-11.
229. Vidotto C, Atamaniuk J, Muller MM, et al. Responses of N-terminal pro-brain natriuretic peptide (NT-proBNP) and cardiac troponin I (cTnI) to competitive endurance exercise in recreational athletes. 2005;26(8):645-50.
230. Virmani R. Jogging, marathon running, and death. 1982;8(4):96-107.
231. Vitarelli A, Capotosto L, Placanica G, et al. Comprehensive assessment of biventricular function and aortic stiffness in athletes with different forms of training by three-dimensional echocardiography and strain imaging. *European heart journal cardiovascular Imaging* 2013;14(10):1010-20.
232. Warburton DER, Welsh RC, Haykowsky MJ, et al. Effects of half ironman competition on the development of late potentials. *Medicine and science in sports and exercise* 2000;32(7):1208-13.
233. Whyte G, George K, Stephenson C, et al. Impact of marathon running on cardiac structure and function in recreational runners. 2005;108(1):73-80.
234. Whyte G, Sharma S, McKenna WJ, et al. Alterations in cardiac morphology and function in elite multi-disciplinary athletes. 1999;20(4):222-26.
235. Whyte GP, George K, Sharma S, et al. The upper limit of physiological cardiac hypertrophy in elite male and female athletes: the British experience. *European journal of applied physiology* 2004;92(4-5):592-7.

236. Whyte GP, Sharma S, George K, et al. Exercise gas exchange responses in the differentiation of pathologic and physiologic left ventricular hypertrophy. *Medicine and science in sports and exercise* 1999;31(9):1237-41.
237. Wilhelm M, Nuoffer J-M, Schmid J-P, et al. Comparison of pro-atrial natriuretic peptide and atrial remodeling in marathon versus non-marathon runners. *The American journal of cardiology* 2012;109(7):1060-5.
238. Wilhelm M, Roten L, Tanner H, et al. Long-term cardiac remodeling and arrhythmias in nonelite marathon runners. *The American journal of cardiology* 2012;110(1):129-35.
239. Wilhelm M, Roten L, Tanner H, et al. Atrial remodeling, autonomic tone, and lifetime training hours in nonelite athletes. *The American journal of cardiology* 2011;108(4):580-5.
240. Wilhelm M, Roten L, Tanner H, et al. Gender differences of atrial and ventricular remodeling and autonomic tone in nonelite athletes. *The American journal of cardiology* 2011;108(10):1489-95.
241. Wilhelm M, Zueger T, De Marchi S, et al. Inflammation and atrial remodeling after a mountain marathon. *Scandinavian journal of medicine & science in sports* 2014;24(3):519-25.
242. Williams PT. High-density lipoprotein cholesterol and other risk factors for coronary heart disease in female runners. *The New England journal of medicine* 1996;334(20):1298-303.

243. Williams PT. Relationship of distance run per week to coronary heart disease risk factors in 8283 male runners. The National Runners' Health Study. Archives of internal medicine 1997;157(2):191-8.
244. Williams PT, Franklin BA. Reduced incidence of cardiac arrhythmias in walkers and runners. PloS one 2013;8(6):e65302.
245. Yu HH, Ginsburg GS, O'Toole ML, et al. Acute changes in serum lipids and lipoprotein subclasses in triathletes as assessed by proton nuclear magnetic resonance spectroscopy. Arteriosclerosis, thrombosis, and vascular biology 1999;19(8):1945-9.
246. Zebrowska A, Mikolajczyk R, Waskiewicz Z, et al. Acute responses of novel cardiac biomarkers to a 24-h ultra-marathon. 2019;8(1)
247. Zha W, Schiros CG, Reddy G, et al. Improved Right Ventricular Performance with Increased Tricuspid Annular Excursion in Athlete's Heart. Frontiers in cardiovascular medicine 2015;2:8.
248. Zilinski JL, Contursi ME, Isaacs SK, et al. Myocardial adaptations to recreational marathon training among middle-aged men. Circulation Cardiovascular imaging 2015;8(2):e002487.
249. Ziman MR, Jeenah MS. The relation between the PST1 restriction fragment length polymorphism at the APO-AI locus and plasma APO-AI concentrations in marathon runners. South African medical journal = Suid-Afrikaanse tydskrif vir geneeskunde 1995;85(10):1013-6.

250. Zorzi A, Mastella G, Cipriani A, et al. Burden of ventricular arrhythmias at 12-lead 24-hour ambulatory ECG monitoring in middle-aged endurance athletes versus sedentary controls. *European journal of preventive cardiology* 2018;25(18):2003-11.

**Supplement 5 – Table showing characteristics of the studies included within the scoping review**

| <b>Study Number</b> | <b>Harvard Reference</b>    | <b>Number of participants</b> | <b>Number of females</b> | <b>Percentage female</b> | <b>Location</b> | <b>Exercise Type</b> |
|---------------------|-----------------------------|-------------------------------|--------------------------|--------------------------|-----------------|----------------------|
| 1                   | Starekova et al. 2020       | 58                            | 0                        | 0.0%                     | European        | Other                |
| 2                   | Mango et al. 2020           | 516                           | 204                      | 39.5%                    | European        | Mixed                |
| 3                   | Pelliccia et al 2020        | 4595                          | 1610                     | 35.0%                    | European        | Mixed                |
| 4                   | D'Silva et al 2020          | 68                            | 32                       | 47.1%                    | European        | Running              |
| 5                   | Bjerring et al. 2020        | 36                            | 12                       | 33.3%                    | European        | Cross-Country Skiing |
| 6                   | Lewicka-Potocka et al. 2020 | 49                            | 0                        | 0.0%                     | European        | Running              |
| 7                   | Bernardino et al. 2020      | 166                           | 74                       | 44.6%                    | European        | Triathlon            |
| 8                   | Tahir et al. 2020           | 50                            | 0                        | 0.0%                     | European        | Triathlon            |
| 9                   | D'Silva et al 2020          | 120                           | 60                       | 50.0%                    | European        | Running              |
| 10                  | Miranda et al. 2020         | 88                            | 26                       | 29.5%                    | Americas        | Other                |
| 11                  | Kunutsor et al. 2020        | 1949                          | 0                        | 0.0%                     | European        | Cross-Country Skiing |
| 12                  | Hosatte-Ducassy et al. 2020 | 99                            | 41                       | 41.4%                    | Americas        | Triathlon            |
| 13                  | Dawkins et al. 2019         | 66                            | 13                       | 19.7%                    | European        | Triathlon            |



|    |                           |        |        |       |                 |                      |
|----|---------------------------|--------|--------|-------|-----------------|----------------------|
| 14 | Bjerring et al. 2019      | 48     | 14     | 29.2% | European        | Cross-Country Skiing |
| 15 | Kunutsor et al 2019       | 1809   | 0      | 0.0%  | European        | Cross-Country Skiing |
| 16 | Jin et al 2019            | 501690 | 250664 | 50.0% | Western Pacific | Other                |
| 17 | Major et al. 2019         | 363    | 109    | 30.0% | European        | Mixed                |
| 18 | Edwards and Loprinzi 2019 | 6694   | 3481   | 52.0% | Americas        | Other                |
| 19 | Hochsmann et al. 2019     | 137    | 97     | 70.8% | Americas        | Other                |
| 20 | Scheer et al 2019         | 1113   | 606    | 54.4% | Americas        | Mixed                |
| 21 | Malek et al 2019          | 40     | 0      | 0.0%  | European        | Running              |
| 22 | Leckie et ak 2019         | 165    | 62     | 37.6% | European        | Running              |
| 23 | Hirata et al. 2019        | 12     | 3      | 25.0% | Western Pacific | Running              |
| 24 | D'Ascenzi et al. 2019     | 1058   | 402    | 38.0% | European        | Mixed                |
| 25 | Zebrowska et al. 2019     | 14     | 0      | 0.0%  | European        | Running              |
| 26 | Svedberg et al. 2019      | 736102 | 256378 | 34.8% | European        | Cross-Country Skiing |
| 27 | Zorzi et al 2018          | 270    | 41     | 15.2% | European        | Mixed                |
| 28 | Gabrielli et al. 2018     | 16     | 0      | 0.0%  | Americas        | Running              |
| 29 | Kaletka et al. 2018       | 40     | 0      | 0.0%  | European        | Running              |

|    |                              |      |     |       |          |                      |
|----|------------------------------|------|-----|-------|----------|----------------------|
| 30 | Bjerring et al. 2018         | 101  | 41  | 40.6% | European | Cross-Country Skiing |
| 31 | Opondo et al. 2018           | 61   | 35  | 57.4% | Americas | Other                |
| 32 | Antero-jacquemin et al. 2018 | 2814 | 696 | 24.7% | European | Mixed                |
| 33 | Krumm et al. 2018            | 18   | 3   | 16.7% | European | Mixed                |
| 34 | Scherr et al 2018            | 422  | 217 | 51.4% | Americas | Mixed                |
| 35 | Vassalle et al. 2018         | 18   | 3   | 16.7% | European | Running              |
| 36 | Tahir et al. 2018            | 119  | 43  | 36.1% | European | Triathlon            |
| 37 | Vicent et al. 2018           | 117  | 8   | 6.8%  | European | Mixed                |
| 38 | Trullas et al. 2018          | 25   | 4   | 16.0% | European | Running              |
| 39 | Harris et al. 2017           | 135  | 20  | 14.8% | Americas | Triathlon            |
| 40 | Radonic et al. 2017          | 233  | 0   | 0.0%  | European | Mixed                |
| 41 | Herm et al. 2017             | 109  | 26  | 23.9% | European | Running              |
| 42 | Roberts et al. 2017          | 50   | 0   | 0.0%  | Americas | Running              |
| 43 | Aengevaeren et al. 2017      | 284  | 0   | 0.0%  | European | Mixed                |
| 44 | Skadberg et al. 2017         | 97   | 23  | 23.7% | European | Mixed                |
| 45 | Rosin 2017                   | 54   | 0   | 0.0%  | Americas | Running              |

|    |                              |        |       |       |          |                      |
|----|------------------------------|--------|-------|-------|----------|----------------------|
| 46 | Pelliccia et al. 2017        | 2352   | 919   | 39.1% | European | Mixed                |
| 47 | Bonsignore et al. 2017       | 71     | 9     | 12.7% | Americas | Running              |
| 48 | Dupont et al. 2017           | 24     | 0     | 0.0%  | European | Triathlon            |
| 49 | D'Ascenzi et al. 2017        | 1009   | 362   | 35.9% | European | Mixed                |
| 50 | Ujka et al. 2017             | 92     | 22    | 23.9% | European | Running              |
| 51 | Merghani et al. 2017         | 244    | 84    | 34.4% | European | Running              |
| 52 | Perrin et al. 2016           | 287    | 103   | 35.9% | European | Mixed                |
| 53 | Abdullah et al. 2016         | 92     | 25    | 27.2% | Americas | Other                |
| 54 | Sanz de la Garza et al. 2016 | 60     | 0     | 0.0%  | European | Running              |
| 55 | Clauss et al. 2016           | 30     | 0     | 0.0%  | European | Running              |
| 56 | Stoggl et al. 2016           | 21     | 8     | 38.1% | European | Cross-Country Skiing |
| 57 | Calvo et al. 2016            | 172    | 22    | 12.8% | European | Other                |
| 58 | Myrstad et al. 2016          | 4952   | 318   | 6.4%  | European | Cross-Country Skiing |
| 59 | Konopka et al. 2016          | 117    | 53    | 45.3% | European | Other                |
| 60 | Lemez et al. 2016            | 205    | 0     | 0.0%  | Americas | Mixed                |
| 61 | Hallmarker et al. 2016       | 204038 | 77534 | 38.0% | European | Cross-Country Skiing |

|    |                              |        |        |        |                 |         |
|----|------------------------------|--------|--------|--------|-----------------|---------|
| 62 | Martin-Beaulieu et al. 2016  | 22     | 13     | 59.1%  | Americas        | Running |
| 63 | Montiel et al. 2016          | 18     | 18     | 100.0% | European        | Running |
| 64 | Zha et al. 2015              | 60     | 30     | 50.0%  | Americas        | Running |
| 65 | Lacey et al. 2015            | 12203  | 0      | 0.0%   | Western Pacific | Other   |
| 66 | Loprinzi et al. 2015         | 16049  | 8121   | 50.6%  | Americas        | Other   |
| 67 | Grabs et al. 2015            | 20     | 0      | 0.0%   | European        | Running |
| 68 | Szauder et al. 2015          | 53     | 0      | 0.0%   | European        | Running |
| 69 | Arem et al. 2015             | 661137 | 369652 | 55.9%  | Americas        | Other   |
| 70 | Tsifilikas et al. 2015       | 50     | 0      | 0.0%   | European        | Running |
| 71 | Antero-Jacquemin et al. 2015 | 2812   | 726    | 25.8%  | European        | Mixed   |
| 72 | Davis et al. 2015            | 71     | 33     | 46.5%  | Americas        | Other   |
| 73 | Zilinski et al. 2015         | 45     | 0      | 0.0%   | Americas        | Running |
| 74 | Gram et al. 2015             | 61     | 0      | 0.0%   | European        | Other   |
| 75 | Demirelli et al. 2015        | 73     | 0      | 0.0%   | European        | Running |
| 76 | Caselli et al. 2015          | 1299   | 526    | 40.5%  | European        | Mixed   |
| 77 | McClellan et al. 2015        | 56     | 0      | 0.0%   | European        | Mixed   |

|    |                              |      |    |       |                 |                      |
|----|------------------------------|------|----|-------|-----------------|----------------------|
| 78 | Lord et al. 2015             | 15   | 1  | 6.7%  | Americas        | Running              |
| 79 | Kettunen et al. 2015         | 4387 | 0  | 0.0%  | European        | Mixed                |
| 80 | Jouffroy et al. 2015         | 66   | 0  | 0.0%  | European        | Running              |
| 81 | Caselli et al. 2015          | 200  | 79 | 39.5% | European        | Mixed                |
| 82 | Vance et al. 2014            | 47   | 0  | 0.0%  | Americas        | Running              |
| 83 | Antero-Jacquemin et al. 2014 | 255  | 0  | 0.0%  | European        | Other                |
| 84 | Myrstad et al. 2014          | 6358 | 0  | 0.0%  | European        | Cross-Country Skiing |
| 85 | Franco et al. 2014           | 19   | 5  | 26.3% | Americas        | Running              |
| 86 | Rimensberger et al. 2014     | 105  | 0  | 0.0%  | European        | Running              |
| 87 | Myrstad et al. 2014          | 3364 | 0  | 0.0%  | European        | Cross-Country Skiing |
| 88 | Mohlenkamp et al. 2014       | 1188 | 0  | 0.0%  | European        | Running              |
| 89 | Hattasch et al. 2014         | 22   | 0  | 0.0%  | European        | Running              |
| 90 | Wilhelm et al. 2014          | 11   | 0  | 0.0%  | European        | Running              |
| 91 | Leischik et al. 2014         | 51   | 0  | 0.0%  | European        | Triathlon            |
| 92 | Leischik and Spelsberg 2014  | 87   | 33 | 37.9% | European        | Triathlon            |
| 93 | Kim et al. 2014              | 249  | 0  | 0.0%  | Western Pacific | Running              |

|     |                            |        |        |        |                 |                      |
|-----|----------------------------|--------|--------|--------|-----------------|----------------------|
| 94  | Dalla Vecchia et al. 2014  | 35     | 4      | 11.4%  | Americas        | Running              |
| 95  | Marijon et al. 2013        | 786    | 0      | 0.0%   | European        | Cross-Country Skiing |
| 96  | Denham et al. 2013         | 130    | 0      | 0.0%   | European        | Running              |
| 97  | Gaudreault et al. 2013     | 20     | 14     | 70.0%  | Americas        | Running              |
| 98  | Simsek et al. 2013         | 77     | 0      | 0.0%   | European        | Mixed                |
| 99  | Williams and Franklin 2013 | 46907  | 27854  | 59.4%  | European        | Mixed                |
| 100 | Andersen et al. 2013       | 54560  | 5443   | 10.0%  | European        | Cross-Country Skiing |
| 101 | Kim et al. 2013            | 59     | 0      | 0.0%   | Western Pacific | Running              |
| 102 | Swift et al. 2013          | 464    | 464    | 100.0% | Americas        | Other                |
| 103 | Karstoft et al. 2013       | 8      | 1      | 12.5%  | European        | Running              |
| 104 | Vitarelli et al. 2013      | 140    | 0      | 0.0%   | European        | Mixed                |
| 105 | Franzen et al. 2013        | 40     | 0      | 0.0%   | European        | Mixed                |
| 106 | Van Buuren et al. 2013     | 291    | 0      | 0.0%   | European        | Other                |
| 107 | Iellamo et al. 2013        | 20     | 0      | 0.0%   | European        | Other                |
| 108 | Iellamo et al. 2013        | 20     | 0      | 0.0%   | European        | Other                |
| 109 | Roberts et al. 2013        | 548092 | 168227 | 30.7%  | Americas        | Running              |

|     |                        |          |         |        |          |         |
|-----|------------------------|----------|---------|--------|----------|---------|
| 110 | Haeusler et al. 2012   | 110      | 27      | 24.5%  | European | Running |
| 111 | Kalstedt et al. 2012   | 25       | 4       | 16.0%  | Americas | Running |
| 112 | Van Buuren et al. 2012 | 33       | 0       | 0.0%   | European | Other   |
| 113 | Mathews et al. 2012    | 3718336  | 1463276 | 39.4%  | Americas | Running |
| 114 | Swift et al. 2012      | 464      | 464     | 100.0% | Americas | Other   |
| 115 | Scherr et al. 2012     | 277      | 0       | 0.0%   | European | Running |
| 116 | Wilhelm et al. 2012    | 138      | 68      | 49.3%  | European | Running |
| 117 | Stoutenberg Et Al 2012 | 42       | 0       | 0.0%   | Americas | Running |
| 118 | Kim et al. 2012        | 10871000 | 4862670 | 44.7%  | Americas | Running |
| 119 | Wilhelm et al. 2012    | 70       | 0       | 0.0%   | European | Running |
| 120 | Caselli et al. 2012    | 92       | 28      | 30.4%  | European | Other   |
| 121 | Swift Et Al 2012       | 94       | 94      | 100.0% | Americas | Other   |
| 122 | Conti et al. 2012      | 35       | 0       | 0.0%   | European | Mixed   |
| 123 | Wilhelm et al. 2011    | 138      | 68      | 49.3%  | European | Running |
| 124 | Wilhelm et al. 2011    | 70       | 0       | 0.0%   | European | Running |
| 125 | Krol et al. 2011       | 79       | 14      | 17.7%  | European | Mixed   |

|     |                        |      |      |       |                 |                      |
|-----|------------------------|------|------|-------|-----------------|----------------------|
| 126 | Grimsmo et al. 2011    | 122  | 0    | 0.0%  | European        | Cross-Country Skiing |
| 127 | Durand et al. 2011     | 527  | 0    | 0.0%  | Americas        | Other                |
| 128 | Minns et al. 2011      | 87   | 41   | 47.1% | Americas        | Running              |
| 129 | Hanssen et al. 2011    | 30   | 0    | 0.0%  | European        | Running              |
| 130 | Pelliccia et al. 2010  | 2317 | 1017 | 43.9% | European        | Mixed                |
| 131 | Banfi et al. 2010      | 15   | 2    | 13.3% | European        | Running              |
| 132 | Pelliccia et al. 2010  | 114  | 25   | 21.9% | European        | Mixed                |
| 133 | Trivax et al. 2010     | 25   | 13   | 52.0% | Americas        | Running              |
| 134 | Grimsmo et al. 2010    | 149  | 0    | 0.0%  | Americas        | Cross-Country Skiing |
| 135 | Andersson et al. 2010  | 20   | 0    | 0.0%  | European        | Cross-Country Skiing |
| 136 | O'Hanlon et al. 2010   | 17   | 0    | 0.0%  | European        | Running              |
| 137 | Scharf et al. 2010     | 26   | 0    | 0.0%  | European        | Triathlon            |
| 138 | Indermuhle et al. 2009 | 60   | 4    | 6.7%  | European        | Triathlon            |
| 139 | Swiatowiec et al. 2009 | 73   | 20   | 27.4% | European        | Mixed                |
| 140 | Her et al. 2009        | 75   | 25   | 33.3% | Western Pacific | Running              |
| 141 | Hawkins, 2009          | 16   | 0    | 0.0%  | Americas        | Mixed                |



|     |                        |       |       |        |                 |           |
|-----|------------------------|-------|-------|--------|-----------------|-----------|
| 142 | Nassenstein, 2009      | 108   | 0     | 0.0%   | European        | Running   |
| 143 | Breuckmann et al. 2009 | 102   | 0     | 0.0%   | European        | Running   |
| 144 | Nottin et al. 2009     | 23    | 0     | 0.0%   | European        | Triathlon |
| 145 | Heinz et al 2009       | 80    | 41    | 51.3%  | European        | Mixed     |
| 146 | Lippi, 2008            | 17    | 0     | 0.0%   | European        | Running   |
| 147 | Lippi et al 2008       | 17    | 0     | 0.0%   | European        | Running   |
| 148 | Molina L, 2008         | 557   | 0     | 0.0%   | European        | Running   |
| 149 | Kasikcioglu et al 2008 | 13    | 0     | 0.0%   | European        | Running   |
| 150 | Poh, 2008              | 39    | 16    | 41.0%  | Americas        | Other     |
| 151 | Koller et al. 2008     | 59    | 7     | 11.9%  | European        | Running   |
| 152 | Lalande, 2007          | 19    | 0     | 0.0%   | Western Pacific | Other     |
| 153 | Belonje, 2007          | 62862 | 47775 | 76.0%  | European        | Mixed     |
| 154 | Carlsson M, 2007       | 36    | 13    | 36.1%  | European        | Triathlon |
| 155 | Musat et al. 2007      | 30    | 30    | 100.0% | European        | Running   |
| 156 | Perseghin et al. 2007  | 33    | 0     | 0.0%   | European        | Running   |
| 157 | Lippi, 2006            | 202   | 0     | 0.0%   | European        | Mixed     |

|     |                      |      |     |       |                 |           |
|-----|----------------------|------|-----|-------|-----------------|-----------|
| 158 | Tian Y, 2006         | 10   | 0   | 0.0%  | Western Pacific | Running   |
| 159 | Petersen et al 2006  | 81   | 37  | 45.7% | European        | Mixed     |
| 160 | Indermuhle A, 2006   | 93   | 60  | 64.5% | European        | Mixed     |
| 161 | Middleton , 2006     | 14   | 1   | 7.1%  | European        | Running   |
| 162 | Saenz et al. 2006    | 35   | 6   | 17.1% | Americas        | Running   |
| 163 | Banfi, 2005          | 49   | 4   | 8.2%  | European        | Triathlon |
| 164 | Scharhag, 2005       | 105  | 13  | 12.4% | European        | Running   |
| 165 | Arrese, 2005         | 188  | 54  | 28.7% | European        | Running   |
| 166 | Real et al 2005      | 22   | 0   | 0.0%  | European        | Running   |
| 167 | Makan, 2005          | 1150 | 309 | 26.9% | European        | Running   |
| 168 | Pavlik, 2005         | 65   | 0   | 0.0%  | European        | Mixed     |
| 169 | Whyte et al. 2005    | 52   | 9   | 17.3% | European        | Running   |
| 170 | Vidotto et al. 2005  | 25   | 13  | 52.0% | European        | Running   |
| 171 | Whyte, 2004          | 442  | 136 | 30.8% | European        | Mixed     |
| 172 | Bennekens et al 2004 | 9    | 2   | 22.2% | European        | Running   |
| 173 | Date, 2003           | 51   | 0   | 0.0%  | Western Pacific | Mixed     |

|     |                       |     |    |       |                 |           |
|-----|-----------------------|-----|----|-------|-----------------|-----------|
| 174 | Galetta, 2003         | 48  | 0  | 0.0%  | European        | Mixed     |
| 175 | Iwasaki, 2003         | 11  | 5  | 45.5% | Americas        | Other     |
| 176 | Herrmann et al. 2003  | 100 | 13 | 13.0% | European        | Mixed     |
| 177 | Draheim et al. 2003   | 145 | 72 | 49.7% | European        | Mixed     |
| 178 | Shave et al. 2002     | 37  | 0  | 0.0%  | European        | Running   |
| 179 | Palazzuoli, 2002      | 45  | 0  | 0.0%  | European        | Running   |
| 180 | Apple, 2002           | 19  | 12 | 63.2% | Americas        | Running   |
| 181 | Palazzuoli, 2001      | 43  | 0  | 0.0%  | European        | Running   |
| 182 | Siegel, 2001          | 82  | 0  | 0.0%  | Americas        | Running   |
| 183 | Matsuo et al 2001     | 48  | 10 | 20.8% | Western Pacific | Mixed     |
| 184 | Ohba, 2001            | 13  | 0  | 0.0%  | Western Pacific | Running   |
| 185 | Claessens et al. 2001 | 74  | 0  | 0.0%  | European        | Triathlon |
| 186 | Ginsburg et al. 2001  | 57  | 19 | 33.3% | Americas        | Triathlon |
| 187 | Claessens, 2000       | 74  | 0  | 0.0%  | European        | Triathlon |
| 188 | Dressendorfer, 2000   | 21  | 0  | 0.0%  | Americas        | Running   |
| 189 | Hildick-Smith, 2000   | 52  | 0  | 0.0%  | European        | Mixed     |

|     |                       |      |     |       |          |           |
|-----|-----------------------|------|-----|-------|----------|-----------|
| 190 | Warburton et al. 2000 | 9    | 0   | 0.0%  | Americas | Triathlon |
| 191 | Pelliccia, 2000       | 1005 | 260 | 25.9% | European | Mixed     |
| 192 | Mattusch et al. 2000  | 14   | 0   | 0.0%  | European | Running   |
| 193 | Claessens et al. 2000 | 74   | 0   | 0.0%  | European | Triathlon |
| 194 | Claessens, 1999       | 74   | 0   | 0.0%  | European | Triathlon |
| 195 | Claessens, 1999       | 74   | 0   | 0.0%  | European | Triathlon |
| 196 | Lucia et al. 1999     | 10   | 1   | 10.0% | European | Running   |
| 197 | Whyte,1999            | 30   | 0   | 0.0%  | European | Triathlon |
| 198 | Yu et al. 1999        | 28   | 6   | 21.4% | Americas | Triathlon |
| 199 | Damm et al. 1999      | 95   | 0   | 0.0%  | European | Mixed     |
| 200 | Mayet, 1999           | 33   | 0   | 0.0%  | European | Mixed     |
| 201 | Pelliccia, 1999       | 1309 | 352 | 26.9% | European | Mixed     |
| 202 | Biffi et al. 1999     | 153  | 0   | 0.0%  | European | Mixed     |
| 203 | Whyte et al. 1999     | 29   | 0   | 0.0%  | European | Mixed     |
| 204 | Furlanello, 1998      | 1772 | 308 | 17.4% | European | Mixed     |
| 205 | Rodriguez-Plaza       | 50   | 0   | 0.0%  | Americas | Running   |

|     |                       |      |      |        |          |                      |
|-----|-----------------------|------|------|--------|----------|----------------------|
| 206 | Bergstrom, 1997       | 879  | 402  | 45.7%  | European | Running              |
| 207 | Sarna, 1997           | 1712 | 0    | 0.0%   | European | Mixed                |
| 208 | Williams, 1997        | 8283 | 0    | 0.0%   | Americas | Running              |
| 209 | Cubeddu et al. 1997   | 50   | 0    | 0.0%   | Americas | Running              |
| 210 | Henriksen, 1996       | 127  | 0    | 0.0%   | European | Mixed                |
| 211 | Ketelhut, 1996        | 30   | 0    | 0.0%   | European | Running              |
| 212 | Ginsburg, 1996        | 39   | 13   | 33.3%  | Americas | Triathlon            |
| 213 | Pelliccia, 1996       | 665  | 665  | 100.0% | European | Mixed                |
| 214 | Williams, 1996        | 1837 | 1837 | 100.0% | Americas | Running              |
| 215 | Biffi et al. 1996     | 60   | 0    | 0.0%   | European | Mixed                |
| 216 | Ziman and Jeenah 1995 | 82   | 0    | 0.0%   | Africa   | Running              |
| 217 | Siegel, 1995          | 8    | 0    | 0.0%   | Americas | Running              |
| 218 | Kokkinos et al. 1995  | 2906 | 0    | 0.0%   | Americas | Running              |
| 219 | Maron, 1994           | 14   | 1    | 7.1%   | Americas | Mixed                |
| 220 | Luurila, 1994         | 37   | 0    | 0.0%   | European | Cross-Country Skiing |
| 221 | Spirito, 1994         | 947  | 209  | 22.1%  | European | Mixed                |

|     |                         |      |    |        |                 |                      |
|-----|-------------------------|------|----|--------|-----------------|----------------------|
| 222 | Martinez-Mas, 1994      | 42   | 0  | 0.0%   | European        | Running              |
| 223 | Imai, 1994              | 60   | 0  | 0.0%   | Western Pacific | Cross-Country Skiing |
| 224 | Sivertssen, 1994        | 24   | 11 | 45.8%  | European        | Cross-Country Skiing |
| 225 | Sarna, 1993             | 2613 | 0  | 0.0%   | European        | Mixed                |
| 226 | Maron, 1993             | 6    | 0  | 0.0%   | European        | Mixed                |
| 227 | Riley-Hagan et al. 1992 | 46   | 46 | 100.0% | Americas        | Mixed                |
| 228 | Ogawa, 1991             | 54   | 0  | 0.0%   | Western Pacific | Cross-Country Skiing |
| 229 | Stray-Gundersen, 1991   | 176  | 48 | 27.3%  | Americas        | Cross-Country Skiing |
| 230 | Morris, 1990            | 9376 | 0  | 0.0%   | European        | Other                |
| 231 | Kostka, 1989            | 194  | 0  | 0.0%   | European        | Running              |
| 232 | Smith, 1989             | 30   | 3  | 10.0%  | Americas        | Running              |
| 233 | Rocker, 1986            | 16   | 0  | 0.0%   | European        | Running              |
| 234 | Siegel, 1985            | 15   | 0  | 0.0%   | Americas        | Running              |
| 235 | Lie, 1985               | 2136 | 0  | 0.0%   | European        | Cross-Country Skiing |
| 236 | Paffenbarger, 1984      | 572  | 0  | 0.0%   | Americas        | Other                |
| 237 | Apple, 1984             | 12   | 0  | 0.0%   | Americas        | Running              |

|     |                          |      |    |       |                 |                      |
|-----|--------------------------|------|----|-------|-----------------|----------------------|
| 238 | Lie, 1984                | 122  | 0  | 0.0%  | European        | Cross-Country Skiing |
| 239 | Apple, 1983              | 2    | 0  | 0.0%  | Americas        | Running              |
| 240 | Siegel, 1983             | 35   | 0  | 0.0%  | Americas        | Running              |
| 241 | Deshaies, 1982           | 95   | 31 | 32.6% | Americas        | Mixed                |
| 242 | Ohman, 1982              | 15   | 0  | 0.0%  | European        | Running              |
| 243 | Virmani et al. 1982      | 30   | 0  | 0.0%  | Americas        | Running              |
| 244 | Siegel, 1981             | 35   | 0  | 0.0%  | Americas        | Running              |
| 245 | Murayama and Kuroda 1980 | 365  | 64 | 17.5% | Western Pacific | Triathlon            |
| 246 | Olivier, 1978            | 48   | 0  | 0.0%  | Africa          | Running              |
| 247 | Lie, 1978                | 149  | 0  | 0.0%  | European        | Cross-Country Skiing |
| 248 | Milvy, 1977              | 9958 | 0  | 0.0%  | Americas        | Running              |
| 249 | Nakamoto, 1969           | 72   | 27 | 37.5% | Western Pacific | Running              |
| 250 | Smith, 1964              | 21   | 0  | 0.0%  | Western Pacific | Mixed                |
